# Supplementary material for: Drivers of the spatiotemporal distribution of dissolved nitrous oxide and air–sea exchange in a coastal Mediterranean area
Source: Copernicus journal article supplement (doi:10.5194/os-21-1515-2025), 2025-07-25

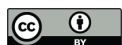

*Supplement of*

**Drivers of the spatiotemporal distribution of dissolved nitrous oxide and air–sea exchange in a coastal Mediterranean area**

**Susana Flecha et al.**

*Correspondence to:* Susana Flecha ([susana.flecha@csic.es](mailto:susana.flecha@csic.es))

The copyright of individual parts of the supplement might differ from the article licence.

1     **SUPPLEMENT**

2     **Figure S1:** Training process monitoring RMSE for both training and validation sets.

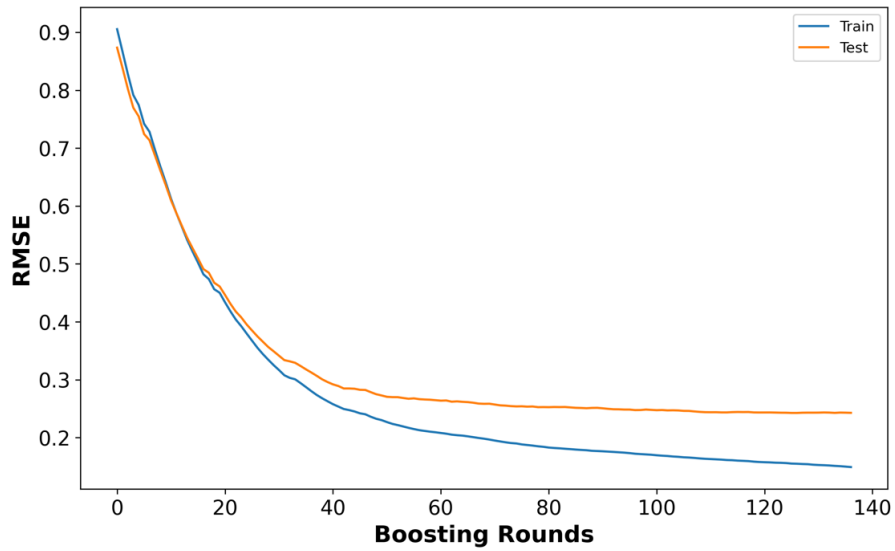

3  
4  
5  
6  
7  
8  
9  
10  
11  
12

**Figure S2:** Relationship of N<sub>2</sub>O and main environmental parameters A) Temperature (°C), B) Chlorophyll a (Chl *a*: µg L<sup>-1</sup>) and C) salinity (PSU) based on the generalized additive models applied. The black dots represent residual concentrations in nmol L<sup>-1</sup>. The inward tick marks on the horizontal axes show data distributions. The model R<sup>2</sup> was 0.96 in the training set and explained 96 % of the response variable. *P*-values for the terms in the model are <0.005 for Temperature and Chl *a* and 0.1390 for salinity.

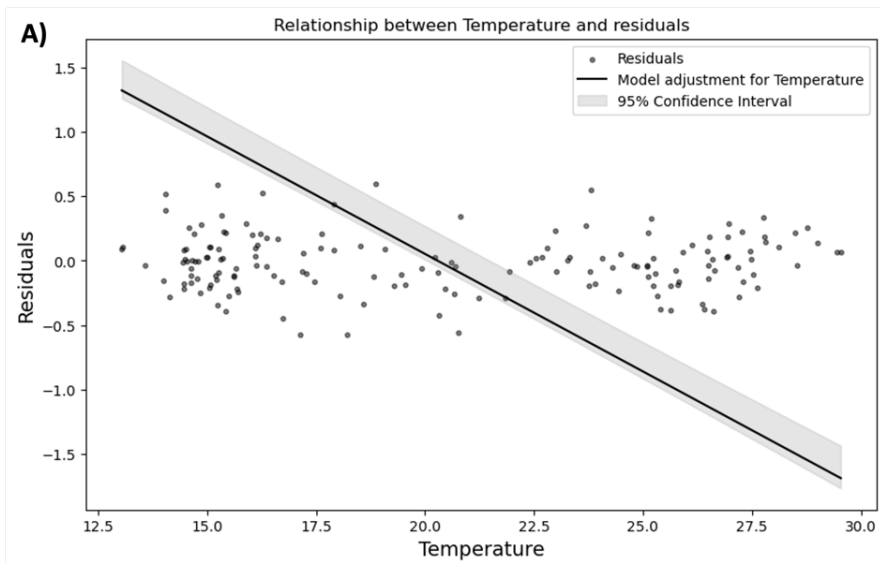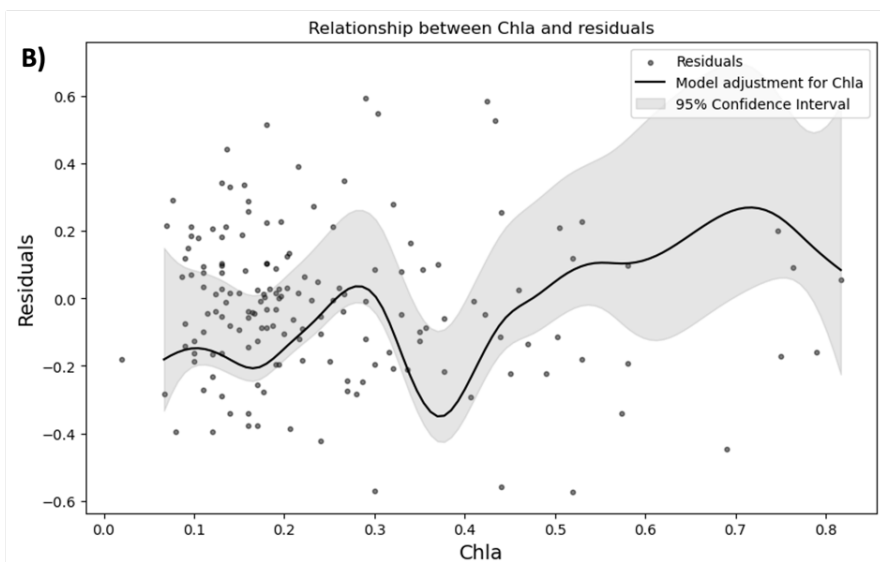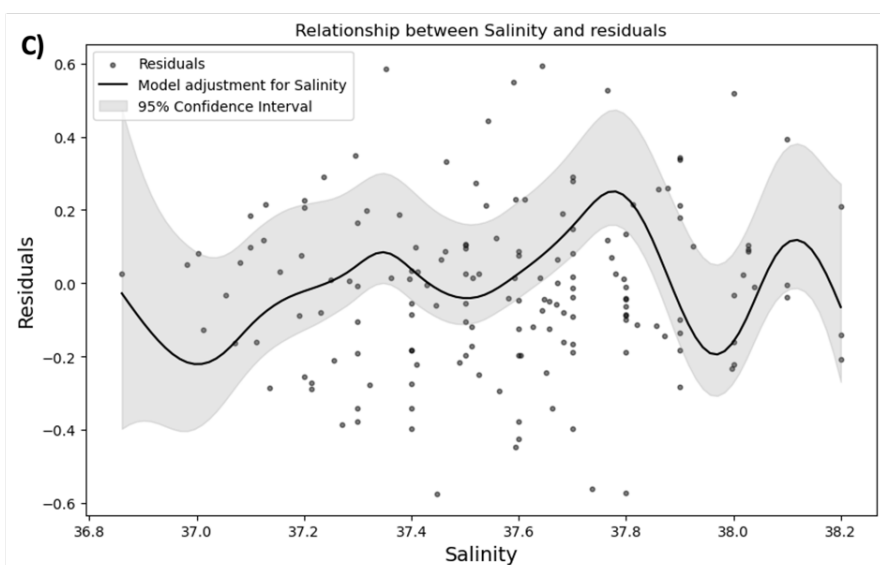

Supplement: Supplementary file 1 [file os-21-1515-2025-supplement.pdf]
